# Supplementary material for: Swimming motility of a gut bacterial symbiont promotes resistance to intestinal expulsion and enhances inflammation
Source: PLoS Biol. 2020 Mar 20;18(3):e3000661. doi: 10.1371/journal.pbio.3000661 (PMC7112236; doi:10.1371/journal.pbio.3000661)
Supplement: S1 Data — (XLSX) [file pbio.3000661.s018.xlsx]

## Sheet: Figure 1A
Figure 1A plotted: cultivation-based bacterial abundances from dissected larval zebrafish intestines.																			Figure 1A inset plotted: cultivation-based bacterial abundances within the water from replicate experiments
Vibrio strain:	wild-type						Dmot						Dche						Vibrio strain:	wild-type						Dmot						Dche
time point (hpi):	3	8	24	48	72		3	8	24	48	72		3	8	24	48	72		time point (hpi):	3	8	24	48	72		3	8	24	48	72		3	8	24	48	72
	2250	221500	275000	460000	8350		15	5	1300	3750	125		15	720	5850	145	3450			1990000	5700000	3700000	4600000	23400000		2200000	5900000	6300000	7600000	5300000		4500000	3400000	1400000	2500000	3900000
	2350	80500	280000	215000	7300		25	260	5650	3550	1300		35	580	9650	1300	5000			3200000	4400000	5100000	5600000	1690000		3500000	6500000	4400000	5700000	3600000		1470000	2300000	2500000	4000000	1030000
	620	63500	1125000	65500	7400		10	255	13500	1650	1025		10	420	27000	10000	715			1880000	4300000	3600000	6800000	3500000				6100000						2300000
	1300	18000	525000	410000	10400		10	400	21000	21500	10		5	325	7700	4900	685					2500000
	6900	62000	590000	140000	7350		25	200	2950	1500	8000		10	135	21000	16500	4600
	3050	83000	350000	440000	245000		30	120	5350	6000	2400		55	735	1300	250	1400		sample size (n):	3	3	4	3	3		2	2	3	2	2		2	2	3	2	2
	665	58000	250000	300000	10550		10	705	80	10500	102500		25	205	7150	4850	12250
	2150	53500	385000	180000	1550		5	655	410	43000	10650		75	55	17500	4900	125
	610	51000	500000	570000	6000		5	2150	1250	3850	11350		70	630	14000	410	3750
	1250	77000	820000	59500	3350		5	55	15000	6800	5200		90	185	11000	8950	870
	4850	133000	385000	115000	96000		5	5	8700	21000	6400		35	210	47500	1850	4900
	1500	74500	610000	43000	24500		5	20	2100	2000	240		120	230	15000	4850	5250
	3400	137500	365000	39500	26500		20	170	2550	3950	980		95	1515	23000	30	565
	2900	44000	395000	250000	16000		15	375	8800	20000	2150		35	5	15500	46500	3850
	8200	35000	380000	114000	28500		15	115	1500	2700	3200		40	795	15500	53000	950
	4550	100500	1100000	270000	48000		5	20	930	380	8150		100	10	3750	11000	2500
	7300	66500	700000	160000	110000		5	505	845	27500	8250		25	220	8300	760	1550
	12150	123000	1020000	50000	95500		10	45	1390	1650	9850		100	10	7200	12500
	325	181000	280000	1220000	27000			690	590	41000			45		2250	12100
	1050	91500	960000	290000	123000				11500	43000					19000
	1100	16500	575000	570000	70500				1650						10450
	1465	30000	665000	570000	180000				945						28500
	1250	8950	1510000	735000	116500				5500						15000
	3800	14000	715000	290000	106500				2200						3900
	1200	16500	1095000	1130000	200000				3800						7850
	1350	17000	525000		1040				35						145
	1055	17000	930000						2800						22500
	520	25000	255000						1950
		14500	155000						6800
		22000	470000
			345000
			410000
			225000
			525000
			140500
			405000
sample size (n):	28	30	36	25	26		18	19	29	20	18		19	18	27	19	17

## Sheet: Figure 1C
Figure 1C plotted: cultivation-based bacterial abundances from dissected larval zebrafish intestines.
condition:	mono-association			competition			competition			competition
bacterial strain:	Aeromonas			Aeromonas	wild-type Vibrio		Aeromonas	Dmot		Aeromonas	Dche
	4050			20	410000		8850	350		131000	84000
	10500			260	330000		2400	140		295	1250
	17000			1100	335000		352000	1400		290	6100
	28000			2900	310000		112000	6500		127500	10000
	48000			620	55500		10650	2050		72000	23500
	66500			15	61000		5800	195		6950	2050
	1035			8500	100500		38000	6150		6550	1200
	6050			50	130000		52000	5700		115	1050
	3100			130	230000		65500	6150		440	2450
	560			15000	200000		32000	700		520	2600
	4100			4400	366000		1950	20		460	680
	8100			1750	228000		1950	505		475	1600
	8800			50	446000		4300	260		10000	1700
	8900			500	174000		8800	950		80	6100
	5250			15	82500		20000	20		2800	1300
	6200			9750	270000		13500	20		17500	13000
	16300			180	290000		5900	150		7000	3650
	11000			45	109000		2300	20		11000	2400
	8200			1750	294000		11500	120		570	5550
	4500			1450	295000					6250	5950
sample size (n):	20			20			19			20

## Sheet: Figure 1D
Figure 1D plotted: normalized cultivation-based bacterial abundances from dissected larval zebrafish intestines.
Vibrio strain:	wild-type						Dmot						Dche
condition:	mono-association (24 hpi)			competition			mono-association (24 hpi)			competition			mono-association (24 hpi)			competition
	0.56701			0.845361			0.590909			0.159091			0.531818			7.63636
	0.57732			0.680412			2.56818			0.0636364			0.877273			0.113636
	2.31959			0.690722			6.13636			0.636364			2.45455			0.554546
	1.08247			0.639175			9.54546			2.95454			0.7			0.909091
	1.2165			0.114433			1.34091			0.931818			1.90909			2.13636
	0.72165			0.125773			2.43182			0.0886364			0.118182			0.186364
	0.515464			0.207216			0.0363636			2.79546			0.65			0.109091
	0.793814			0.268041			0.186364			2.59091			1.59091			0.0954545
	1.03093			0.474227			0.568182			2.79546			1.27273			0.222727
	1.69072			0.412371			6.81818			0.318182			1			0.236364
	0.793814			0.754639			3.95455			0.00909091			4.31818			0.0618182
	1.25773			0.470103			0.954545			0.229545			1.36364			0.145455
	0.752577			0.919588			1.15909			0.118182			2.09091			0.154546
	0.814433			0.358763			4			0.431818			1.40909			0.554546
	0.783505			0.170103			0.681818			0.00909091			1.40909			0.118182
	2.26804			0.556701			0.422727			0.00909091			0.340909			1.18182
	1.4433			0.597938			0.384091			0.0681818			0.754545			0.331818
	2.10309			0.224742			0.631818			0.00909091			0.654545			0.218182
	0.57732			0.606186			0.268182			0.0545455			0.204545			0.504545
	1.97938			0.608247			5.22727						1.72727			0.540909
	1.18557						0.75						0.95
	1.37113						0.429546						2.59091
	3.1134						2.5						1.36364
	1.47423						1						0.354545
	2.25773						1.72727						0.713636
	1.08247						0.0159091						0.0131818
	1.91753						1.27273						2.04546
	0.525773						0.886364
	0.319588						3.09091
	0.969072
	0.71134
	0.845361
	0.463917
	1.08247
	0.289691
	0.835051
sample size (n):	36			20			29			19			27			20

## Sheet: Figure 2F
Figure 2F plotted: image-based quantification of planktonic fraction of intestinal populations.
Vibrio strain:	wild-type		Dmot		Dche
	0.999294		0.00314988		0.083014
	0.989141		0.045697		1
	0.98443		0.0171426		0.0198705
	1		0.256864		0.0238555
	1		0.0952113		0.00822281
	1		0.0333635		0.018508
	1		0.0323636		0.00741007
	1		0.0177146		0.185425
	1		0.545377		1
	1		0.0100883		0.361481
			0.0304453		0.391496
			0.317873		0.469954
			0.561058		0.0810291
			0.0116529		0.0335597
			0.706246		0.0250438
			0.228423		0.173342
					0.157811
					0.0888593
sample size (n):	10		16		18

## Sheet: Figure 2G
Figure 2G plotted: 1D distributions of Vibrio abundances along the intestine.
	x-axis (bins):	0	0.025641	0.0512821	0.0769231	0.102564	0.128205	0.153846	0.179487	0.205128	0.230769	0.25641	0.282051	0.307692	0.333333	0.358974	0.384615	0.410256	0.435897	0.461538	0.487179	0.512821	0.538462	0.564103	0.589744	0.615385	0.641026	0.666667	0.692308	0.717949	0.74359	0.769231	0.794872	0.820513	0.846154	0.871795	0.897436	0.923077	0.948718	0.974359	1
	fish #
wild-type	1	2.83376	2.80827	2.37016	2.14908	0.157398	0	0	0	0	0	0	0	0	0	0	0.0804063	0.188189	0.197631	0.158567	0.158567	0.126775	0	0	0.0144778	0	0.0144778	0	0.0679971	0	0	0	0	0	0	0	0	0	0	0.0284885	1.26374
	2	2.1263	2.45117	2.43521	1.94535	0.263959	0.455537	0.30496	0.22812	0.246409	0.22812	0.0725507	0.0304893	0.0304893	0.0155122	0.12296	0.0449671	0.12296	0.0449671	0.0857121	0.0725507	0.0449671	0.0984864	0.0155122	0	0	0.0155122	0	0.0449671	0.0449671	0.0155122	0	0.0155122	0.0725507	0.12296	0.0725507	0.110896	0.0725507	0.157264	0.12296	2.21879
	3	3.025	2.92578	2.61811	1.62945	0.104903	0.0601022	0.0431059	0.0292073	0.0292073	0.0565735	0.15282	0.0575731	0.029583	0.106619	0.0431059	0.17125	0.119048	0.0696359	0.0148491	0	0.0431059	0.0148491	0.0292073	0.0565735	0.0292073	0.0292073	0.118279	0.082317	0	0.0292073	0.0148491	0.18234	0.118279	0.238155	0.201753	0.082317	0.18234	0.162019	0.18234	0.409124
	4	3.03245	3.37969	3.38495	3.22214	2.84629	2.2045	1.46442	0.87123	0.823809	0.191222	0.69062	0.431626	1.29836	1.2898	1.37965	1.1541	0.962354	0.116506	0.395361	0.918971	0.323487	0.0931821	0.182222	0.849979	0.490148	0.0424038	0.339967	0.857724	0.0741439	0.116506	0.850272	0.892927	0.159701	0.683598	0.795065	0.24454	0.149544	0.680656	0.621369	3.01742
	5	3.20161	3.78021	3.73681	3.62819	3.30912	2.97456	2.2017	1.96028	1.09224	0.793809	0.30542	0.14994	0.155423	0.450941	0.30179	0.137365	0.256237	0.0402048	0.141901	0.0635274	0.0443921	0.0444163	0.0305596	0.108903	0.0978147	0.146092	0.0593824	0.14624	0.0290414	0.139069	0.102961	0.100549	0.0798431	0.0681228	0.092873	0.194208	0.411141	0.126701	0.11701	2.61047
	6	3.64374	3.70595	3.5532	3.24771	2.88975	2.22848	0.992534	0.444177	0.507409	0.316597	0.736834	0.265726	0.211671	0.224368	0.195239	0.124678	0.130937	0.0829742	0.0829742	0.0570385	0.029455	0	0	0	0	0.0149772	0	0.0701999	0.408802	0.0953835	0.15261	0.566063	0.703065	0.719793	0.29329	0.0701999	0.058163	0.241063	0.162344	1.87277
	7	3.114	3.15532	2.67662	2.42427	2.12092	1.57924	0.484076	0.260567	0.440109	0.13943	0.152617	0.140179	0.140179	0.165314	0.246082	0.470136	0.796855	1.255	1.19712	0.981634	0.936803	0.0956923	0.160523	0.0563438	0.0147859	0.029085	0.0563438	0.029085	0	0.029085	0.0147859	0.0693573	0.0819922	0.0819922	0.129148	0.161433	0.0819922	0.0147859	0.0147859	2.61137
Dmot	1	0.10621	0.301969	0.351555	0.447292	0.309409	0.286696	0.10621	0.117831	0	0.029085	0.0429282	0	0.029085	0.0819922	0.0819922	0.0429282	0.0147859	0	0	0	0	0	0	0	0	0.0147859	0	0	0	0.0559861	0	0.0429282	0.191482	0.171682	0.201054	0.0429282	0	0.029085	0.0147859	0.0942699
	2	0	0.0845053	0.902035	0.345888	0.0893067	0.0257435	0.0337819	0.0161098	0.0257435	0.050046	0.0617057	0.429476	0.905503	0.49885	0.0380647	0	0	0.0257435	0.0257435	0.0257435	0	0	0	0.0130625	0	0.0130625	0	0	0.0730604	0.0130625	0	0	0	0.14518	0.0949163	0.0380647	0.0617057	0.0130625	0.0257435	0.190225
	3	0.454101	1.5037	1.39219	0.267001	0.791527	0.617053	0.138303	0.166948	0.138303	0.0630517	0.0630517	0.107634	0.0263289	0.0389181	0	0	0	0	0	0	0	0.013364	0	0	0	0.0389181	0.0263289	0	0	0.0263289	0	0	0.0263289	0.0263289	0.0389181	0.0389181	0	0	0	0.449599
	4	0	0	0.0399633	0.23219	0.364976	0.333775	0.271254	0.278662	0.189261	0.189261	0.161308	0.215524	0.099345	0.14162	0.206945	0.161308	0.120997	0.0646985	0.099345	0.052507	0	0	0	0	0	0	0	0	0	0	0	0.0270465	0.052507	0.0270465	0.0137338	0	0.0399633	0.0765571	0.0646985	0.66563
	5	0	1.06457	1.65254	1.73675	0.429198	0.570331	0.199884	0.320889	1.04051	1.5832	1.98024	1.78758	0.608328	0.0638645	0.0331051	0.0331051	0	0.0331051	0.0638645	0	0.0638645	0.27214	0.168865	0.0925886	0	0.191578	0.168865	0.144898	0.0331051	0	0.0331051	0.11953	0.307432	0.191578	0.0925886	0.11953	0.0331051	0.0638645	0	0.0925886
	6	0.295847	0.377133	0.330207	0.094844	0.0229384	0.0754851	0.0552228	0.0654721	0.0229384	0	0.0852724	0.0852724	0.0552228	0.104209	0.0339687	0	0.0339687	0.0116206	0	0	0	0	0.0339687	0.148226	0.104209	0.113377	0.0447257	0.0552228	0.0852724	0.0852724	0.0552228	0	0	0	0.0339687	0.0552228	0.217707	0.346419	0.148226	0.445578
	7	0	0.157123	0.413257	0.488117	0.333215	0.116506	0.0424038	0.0321847	0.0523881	0.0810333	0.0991315	0	0.604284	0.623759	0.0526969	0.0217192	0	0.0109954	0	0.0109954	0.0217192	0	0	0.0901766	0.179787	0.157123	0.0523881	0.0217192	0.0424038	0.201327	0.558155	0.701582	1.01266	0.70231	0.573288	0.247784	0.133211	0.31742	0.306562	0.599267
Dche	1	0.97628	0.789098	0.585105	0.519343	0.41857	0.187673	0.121994	0.0153749	0	0.0445821	0.030224	0.0584807	0.0445821	0.0445821	0.0584807	0.0445821	0.0153749	0.0445821	0.030224	0.030224	0.0153749	0.0153749	0	0	0.0153749	0	0	0	0	0	0.030224	0	0.0153749	0	0	0	0.0153749	0.0584807	0.0719483	0.572401
	2	0.500271	0.318507	0.248696	0.258061	0.116999	0.0476416	0.0476416	0.0624276	0.0164681	0.0164681	0.0164681	0.0323345	0.0164681	0.0323345	0.0767266	0.116999	0.0323345	0	0.0323345	0.0476416	0	0	0.0164681	0	0	0	0	0	0	0	0	0.0476416	0.153852	0.141912	0.165472	0.153852	0.116999	0.0905698	0.0164681	0.0164681
	3	0.0887457	0.181334	0.514177	0.716882	0.478292	0.272884	0.162397	0.0651849	0.0272588	0.0272588	0.0138432	0.0138432	0.0402723	0.142597	0.15261	0.162397	0.0529073	0.0402723	0.0138432	0	0.0138432	0	0	0	0	0	0	0	0	0	0	0	0	0.0138432	0.111094	0.162397	0.257611	0.225351	0.249768	0.15261
	4	0.625835	1.03345	0.774349	0.403335	0.210853	0.258278	0.227244	0.235213	0.670875	0.134348	0.822768	1.29228	1.35565	0.593568	0.30047	0.508218	0.0511525	0.0630517	0.0511525	0.0389181	0.0389181	0.0263289	0.0630517	0.157608	0.0746336	0.013364	0.013364	0.013364	0.0389181	0.0746336	0.0511525	0.0511525	0	0.0263289	0.0263289	0	0	0.0389181	0	0.0263289
	5	2.25017	2.44598	1.26764	0.991035	0.993756	0.761204	0.647093	0.51607	0.177162	0.15066	1.27311	1.57237	1.35085	1.58409	1.53158	1.32942	0.895366	0.8324	0.266582	0.0710634	0.144547	0.102662	0.0599979	0	0.132117	0.0923827	0.132117	0.0250023	0.0250023	0.0369836	0.0369836	0.012681	0.012681	0.0250023	0.012681	0.0250023	0.012681	0	0.012681	0.185637
	6	1.12366	0.723074	0.585548	0.543314	0.50985	0.50548	0.360886	0.0651849	0.0402723	0.0272588	0.0529073	0.121851	0.142597	0.181334	0.15261	0.0402723	0.0138432	0	0.0138432	0.0651849	0	0.0138432	0.0138432	0.0138432	0.0138432	0	0.0402723	0.0138432	0	0.0138432	0.0138432	0	0	0.0138432	0	0	0	0	0.0272588	0
	7	1.18328	1.39614	0.868765	0.697502	0.841418	0.787517	0.583816	0.560255	0.338742	0.158006	0.0283722	0.0800965	0.0550039	0.103818	0.170099	0.80878	0.522389	0.195807	0.0800965	0.1095	0.083843	0.0283722	0.0283722	0.0418922	0.0418922	0.0283722	0.0144177	0.0144177	0.0144177	0.0283722	0.0144177	0.0144177	0.0144177	0.0144177	0	0.0144177	0	0	0.0418922	2.61982
	8	1.65321	1.0715	0.792118	0.761825	0.541203	0.316207	0.349956	0.398049	0.273601	0.302588	0.569667	1.19671	1.11235	0.599858	0.559128	0.231197	0.186268	0.213779	0.0545714	0.0142991	0.0672063	0.0142991	0.0281423	0.147857	0.0142991	0.0281423	0.0415578	0.0281423	0.0545714	0.0914241	0.0914241	0.103045	0.0415578	0	0.079484	0	0.0415578	0.156896	0.176697	2.00081

## Sheet: Figure 3A
Figure 3A plotted: image-based quantification of bacterial abundances over time within larval zebrafish intestines.
	wild-type Vibrio												Dmot													Dche
	fish 1			fish 2			fish 3			fish 4				fish 1			fish 2			fish 3			fish 4			fish 5				fish 1			fish 2			fish 3			fish 4			fish 5			fish 6			fish 7
	time (h)	abundance		time (h)	abundance		time (h)	abundance		time (h)	abundance			time (h)	abundance		time (h)	abundance		time (h)	abundance		time (h)	abundance		time (h)	abundance			time (h)	abundance		time (h)	abundance		time (h)	abundance		time (h)	abundance		time (h)	abundance		time (h)	abundance		time (h)	abundance
	0	480454		0	1.00498e+06		0	917745		0	212249			0.333333	908.897		0.333333	39.4733		0.333333	16858.1		0.333333	201.196		0.333333	1860.67			0.333333	12049.2		0.333333	2744.96		0.333333	8347.06		0.333333	5078.1		0	4632.46		0	35715.7		0	550.505
	0.333333	430158		0.333333	957810		0.333333	828441		0.333333	176026			0.666667	1378.86		0.666667	35.0139		0.666667	20265.5		0.666667	378.17		0.666667	2348.44			0.666667	9064.26		0.666667	2403.07		0.666667	6976.29		0.666667	4762.99		0.333333	3658.26		0.333333	29876.2		0.333333	526.576
	0.666667	422420		0.666667	857161		0.666667	742100		0.666667	169831			1	1363.98		1	24.5115		1	25287.2		1	241.405		1	934.66			1	10764.9		1	3055.16		1	6736.12		1	4937.21		0.666667	3205.61		0.666667	24955.2		0.666667	526.972
	1	414373		1	786914		1	675335		1	136470			1.33333	1553.83		1.33333	39.9352		1.33333	19555.6		1.33333	42.9903		1.33333	637.982			1.33333	9021.97		1.33333	7236.27		1.33333	5869.71		1.33333	5026.31		1	2626.24		1	26086.7		1	545.107
	1.33333	413808		1.33333	764335		1.33333	613700		1.33333	134427			1.66667	1391.19		1.66667	52.265		1.66667	18635		1.66667	44.956		1.66667	579.167			1.66667	4361.75		1.66667	6889.74		1.66667	5323.26		1.66667	4377.47		1.33333	3692.57		1.33333	24809		1.33333	553.334
	1.66667	349240		1.66667	711581		1.66667	566061		1.66667	134544			2	1629.81		2	34.1553		2	20995.6		2	37.4118		2	969.066			2	1286.43		2	7463.69		2	6351.48		2	4579.91		1.66667	6351.12		1.66667	21719.5		1.66667	692.082
	2	380584		2	742091		2	491230		2	135222			2.33333	1800.04		2.33333	30.7361		2.33333	21779.3		2.33333	94.0395		2.33333	1063.2			2.33333	926.475		2.33333	8035.68		2.33333	7206.16		2.33333	5893.23		2	5275.29		2	17029.3		2	615.487
	2.33333	328578		2.33333	691591		2.33333	508025		2.33333	133375			2.66667	2216.43		2.66667	16.863		2.66667	24375		2.66667	39.7299		2.66667	891.575			2.66667	682.713		2.66667	8953.94		2.66667	5309.88		2.66667	5568.47		2.33333	4235.63		2.33333	16924.6		2.33333	656.695
	2.66667	364069		2.66667	610263		2.66667	452949		2.66667	135125			3	2558.82		3	21.2324		3	25504.5		3	80.2838		3	803.018			3	455.997		3	6419.41		3	5398.23		3	5748.13		2.66667	4341.53		2.66667	21150.3		2.66667	623.655
	3	253936		3	553951		3	456345		3	136715			3.33333	2883.47		3.33333	0.48557		3.33333	29936.8		3.33333	79.293		3.33333	1212.14			3.33333	523.974		3.33333	6313.59		3.33333	2494.2		3.33333	6375.97		3	5740.23		3	9601.25		3	679.996
	3.66667	337654		3.33333	611331		3.33333	446628		3.33333	121890			3.66667	3314.89		3.66667	0.577951		3.66667	35499.1		3.66667	74.3534		3.66667	1226.62			3.66667	637.062		3.66667	5354.63		3.66667	2969.07		3.66667	7394.69		3.33333	5934.09		3.33333	10768.4		3.33333	527.483
	4	299741		3.66667	543596		3.66667	424689		3.66667	121860			4	3790.95		4	0		4	42901.8		4	88.6128		4	1049.67			4	502.804		4	4509.19		4	4123.59		4	11998.7		3.66667	6252.69		3.66667	5947.23		3.66667	529.875
	4.33333	303557		4	561895		4	365787		4	116219			4.33333	4538.26		4.33333	0.272684		4.33333	41828.1		4.33333	61.5592		4.33333	1165.63			4.33333	384.672		4.33333	6722.64		4.33333	4420.27		4.33333	9702.33		4	7275		4	2571.32		4	538.969
	4.66667	305646		4.33333	547636		4.33333	376802		4.33333	118848			4.66667	4980.69		4.66667	5.91951		4.66667	54511.8		4.66667	187.79		4.66667	1135.76			4.66667	714.519		4.66667	7056.06		4.66667	5239.85		4.66667	17269.7		4.33333	6673.42		4.33333	2694.48		4.33333	537.842
	5	263246		4.66667	497221		4.66667	380843		4.66667	117174			5	5938.97		5	5.00707		5	48813.5		5	270.54		5	1267.56			5	1007.89		5	8350.65		5	6371.17		5	8733.84		4.66667	4699.89		4.66667	2005.7		4.66667	553.153
	5.33333	229185		5	523509		5	358684		5	114058			5.33333	6789.63		5.33333	5.33019		5.33333	60617.1		5.33333	212.446		5.33333	1606.33			5.33333	2097.95		5.33333	10046.5		5.33333	9248.08		5.33333	20087.8		5	5027.74		5	2189.86		5	560.355
	5.66667	213190		5.33333	498749		5.33333	350532		5.33333	110236			5.66667	8202.32		5.66667	5.63541		5.66667	64140.3		5.66667	247.294		5.66667	2236.44			5.66667	2463.28		5.66667	12374.4		5.66667	7626.81		5.66667	22606.3		5.33333	5141.59		5.33333	2932.21		5.33333	628.131
	6	225842		5.66667	481045		5.66667	347754		5.66667	107780			6	8777.83		6	40.8399		6	65272.7		6	415.693		6	2853.15			6	2955.26		6	10745.9		6	13793.2		6	21824		5.66667	6167.2		5.66667	3472.52		5.66667	818.324
	6.33333	232674		6	478472		6	345454		6	95213.4			6.33333	10821.4		6.33333	28.4368		6.33333	81761.1		6.33333	676.104		6.33333	2635.51			6.33333	4830.27		6.33333	9790.54		6.33333	11355.3		6.33333	11833.9		6	5595.52		6	4850.09		6	1010.46
	6.66667	225189		6.33333	456112		6.33333	356210		6.33333	104678			6.66667	517.498		6.66667	11.8118		6.66667	93941.9		6.66667	1140.29		6.66667	2677.68			6.66667	4320.83		6.66667	10802.3		6.66667	15280.9		6.66667	17977.4		6.33333	7055.28		6.33333	4670.65		6.33333	1209.99
	7	211561		6.66667	471260		6.66667	363286		6.66667	90806.5			7	1064.03		7	24.2204		7	87023.8		7	1102.21		7	4417.97			7	6357.87		7	11254.2		7	20928.8		7	20295.6		6.66667	9409.12		6.66667	3799.93		6.66667	1430.8
	7.33333	223852		7	392772		7	354768		7	88460			7.33333	1444.11		7.33333	6.47486		7.33333	89892.3		7.33333	1555.09		7.33333	3916.47			7.33333	5333.67		7.33333	10439.2		7.33333	29244.5		7.33333	18005		7	8894.87		7	4308.39		7	2281.48
	7.66667	196206		7.33333	429982		7.33333	374692		7.33333	97112.3			7.66667	1323.05		7.66667	2.72208		7.66667	96092.6		7.66667	2006.88		7.66667	5191.67			7.66667	6202.58		7.66667	10864.4		7.66667	27551.1		7.66667	18240.2		7.33333	10472.7		7.33333	5286.44		7.33333	2603.16
	8	219520		7.66667	400111		7.66667	342530		7.66667	86300.1			8	1099.83		8	5.82536		8	92359		8	3275.46		8	4690.15			8	6223.78		8	12439		8	13755		8	32141.6		7.66667	11525.6		7.66667	5869.33		7.66667	3291.01
	8.33333	206324		8	376907		8	362405		8	74266.1			8.33333	1156.35		8.33333	12.7966		8.33333	90987.2		8.33333	2938.97		8.33333	4818.19			8.33333	4057.2		8.33333	14856.6		8.33333	30142.7		8.33333	31207.2		8	10651.9		8	5387.88		8	4077.48
	8.66667	193547		8.33333	392372		8.33333	373450		8.33333	88047.4			9	2083.37		8.66667	0.998619		8.66667	69437.9		8.66667	6286.82		8.66667	2470.16			8.66667	5400.09		8.66667	14802.4		8.66667	37096.1		8.66667	35406.1		8.33333	12072.1		8.33333	6822.25		8.33333	2930.94
	9	182328		8.66667	360315		8.66667	373857		8.66667	80536.7			9.33333	2074.06		9	1.02277		9	67542.5		9	6232.38		9	2004.72			9	5844.29		9	14518.3		9	36887.1		9	39652.9		8.66667	13655.9		8.66667	7602.4		8.66667	4417.89
	9.33333	181794		9	377118		9	334712		9	80212.8			9.66667	2018.7		9.33333	1.53782		9.33333	66508.3		9.33333	6164.43		9.33333	1975.21			9.33333	6237.73		9.33333	19754.6		9.33333	33346.9		9.33333	44347.6		9	14803.1		9	12323.5		9	4390.94
	9.66667	184488		9.33333	368233		9.33333	362470		9.33333	73887.9			10	2419.04		9.66667	1.93577		9.66667	72386.8		9.66667	3559.26		9.66667	1958.85			9.66667	8619.8		9.66667	19754.9		9.66667	31511.3		9.66667	47088.9		9.33333	14448.7		9.33333	13153.9		9.33333	5561.77
	10	172162		9.66667	239770		9.66667	304787		9.66667	84045.5			10.3333	2144.08		10	2.45702		10	78670		10	5231.83		10	2490.12			10	5954.45		10	21616.7		10	29358.7		10	48941.5		9.66667	13057		9.66667	11992.6		9.66667	6739.82
	10.3333	166021		10	361406		10	359992		10	81375.1			10.6667	1495.69		10.3333	2.75084		10.3333	78710.1		10.3333	5112.89		10.3333	1708.22			10.3333	5814.13		10.3333	23427		10.3333	32383.7		10.3333	49861.4		10	17522.1		10	13240.7		10	6604.12
	10.6667	166227		10.3333	391418		10.3333	473431		10.3333	83763.7			11	4460.36		10.6667	3.30744		10.6667	94090.1		10.6667	6076.05		10.6667	6030.85			10.6667	125.982		10.6667	24658.9		10.6667	28765.8		10.6667	46822.4		10.3333	26453.8		10.3333	13663.1		10.3333	6003.58
	11	163206		10.6667	320485		10.6667	440209		10.6667	86843.4			11.3333	2331.63		11	6.69172		11	85887.8		11	7279.51		11	4012.2			11	1016.15		11	27989.2		11	22838.6		11	43166.3		10.6667	26052.7		10.6667	12685.5		10.6667	4359.01
	11.3333	156961		11	326547		11	408799		11	85130.7			11.6667	2364.74		11.3333	5.60613		11.3333	86691.4		11.3333	9852.86		11.3333	3308.32			11.6667	294.511		11.3333	27377.7		11.3333	28862.2		11.3333	23991.9		11	32473.3		11	13844.4		11	982.491
				11.3333	341272		11.3333	262925		11.3333	79815.5			12	1033.91		11.6667	5.299		11.6667	86799.5		11.6667	9720.84		11.6667	3182.76			12	307.273		11.6667	31057.9		11.6667	27132.7		11.6667	39933.4		11.3333	29939.7		11.3333	15606.6		11.3333	963.59
														12.3333	1983.92		12	5.42255		12	86999.1		12	9923.25		12	5430.41			12.3333	461.101		12	29115.5		12	28911.3		12	48433		11.6667	38247.4		11.6667	18655.3		11.6667	1271.43
														12.6667	1282.31		12.3333	6.69779		12.3333	56543.4		12.3333	12620.6		12.3333	2029.14			12.6667	425.734		12.3333	36285.8		12.3333	32762.5		12.3333	57748.9		12	38465.2		12	21862.1		12	1047.63
														13	371.237		12.6667	9.14801		12.6667	16328.8		12.6667	11113.2		12.6667	2808.6			13	463.605		12.6667	38909		12.6667	37962.8		12.6667	56200.9		12.3333	46306.6		12.3333	7917.72		12.3333	1066.21
														13.3333	456.253		13	11.2652		13	6338.3		13	13009.2		13	441.787			13.3333	444.545		13	43754.7		13	41720.2		13	43257.5		12.6667	51325.4		12.6667	9229.67		12.6667	955.955
														13.6667	1374.45		13.3333	15.1854		13.3333	7597.78		13.3333	10506.1		13.3333	809.658			13.6667	0.19376		13.3333	24733.9		13.3333	34297.3		13.3333	42971.5		13	35631.2		13	6534.88		13	1175.59
														14	678.102		13.6667	16.7494		13.6667	7858.99		13.6667	7238.79		13.6667	570.972			14	0.169381					13.6667	47393.6		13.6667	28178.4		13.3333	42268.5		13.3333	7760.27		13.3333	966.871
														14.3333	1458.32		14	19.1914		14	7401.65		14	8313.38		14	179.604			14.3333	0.012609					14	53012.9		14	55894.8		13.6667	43590.5		13.6667	9140.11		13.6667	932.713
														14.6667	1223.82		14.3333	23.074		14.3333	6866.85		14.3333	6219.75		14.3333	51.3093			14.6667	0.645826					14.3333	50602.2		14.3333	2179.59		14	61990.2		14	6894.68		14	748.802
																														15	1.52744					14.6667	54723.9		14.6667	2175.48		14.3333	52135.8		14.3333	8439.36		14.3333	1128.65
																														15.3333	0.554882					15	19838.7		15	1842.59		14.6667	73855.2		14.6667	6449.43		14.6667	1001.35
																														15.6667	1.97722					15.3333	59149.1		15.3333	2141.43		15	3549.12		15	5815.68		15	804.624
																																				15.6667	23924		15.6667	1598.06		15.3333	2040.42		15.3333	1729.09		15.3333	711.34
																																										15.6667	2398.79		15.6667	1352.52		15.6667	686.519
																																										16	2893.83		16	1362.31		16	616.631
																																										16.3333	3331.77		16.3333	1368.25		16.3333	615.728
																																										16.6667	0		16.6667	0		16.6667	0

## Sheet: Figure 3B
Figure 3B plotted: cultivation-based bacterial abundances from dissected larval zebrafish intestines.
Vibrio strain:	Dmot			Dche
host:	ret-/-	sib		ret-/-	sib
	37500	10		131500	1430
	33000	2650		94500	17500
	9350	2500		92500	120
	5300	15		35500	16500
	242000	2250		49500	275
	10	13500		191500	37500
	300	35		125500	150
	27000	117000		104000	140
	58500	20		45500	290
	18500	30		24000	16000
	10000	8350		47500	170
	82500	2200		121000	13050
	37500	45000		48500	3700
	2164000	80000		204000	28000
	26500	240		119500	33500
	10000	2150		15	1950
	20000	2300		86000	685
	155500	3100		179500	3500
		6650		13000	1100
		2000		342000	1850
sample size (n):	18	20		20	20

## Sheet: Figure 4D
Figure 4D plotted: imaged-based quantification of population center of mass within larval zebrafish intestines over time.
	wild-type Vibrio						VibriomotLOF "ON"
	time (h)	fish 1	fish 2	fish 3	fish 4		time (h)	fish 1	fish 2	fish 3	fish 4
	0	0.0832573	0.0992929	0.0639342	0.0577448		0	0.145588	0.146197	0.0995267	0.0864976
	0.333333	0.09612	0.0981838	0.0728925	0.0468517		0.5	0.19572	0.0832331	0.102543	0.0998801
	0.666667	0.10378	0.118276	0.0714735	0.0386381		1	0.147753	0.18042	0.0878154	0.102935
	1	0.109114	0.100656	0.0739564	0.0392454		1.5	0.119754	0.123748	0.0978885	0.114527
	1.33333	0.0839748	0.0975217	0.0769148	0.0410739		2	0.103222	0.0884545	0.0812094	0.081404
	1.66667	0.0737286	0.102482	0.0834367	0.0439988		2.5	0.128466	0.085862	0.0658511	0.112867
	2	0.0822618	0.1293	0.0715866	0.0406977		3	0.168524	0.102933	0.0844193	0.143848
	2.33333	0.0739115	0.100121	0.08349	0.0475834		3.5	0.203145	0.116062	0.0793666	0.124826
	2.66667	0.0772361	0.0989614	0.0731469	0.0461197		4	0.163287	0.121087	0.0837424	0.150132
	3	0.00990858	0.168487	0.0742246	0.0488301		4.5	0.209593	0.154324	0.0850826	0.163275
	3.33333	0.121161	0.124564	0.0911541	0.0586932		5	0.225088	0.17479	0.111703	0.214546
	3.66667	0.139301	0.143983	0.0877776	0.0590516		5.5	0.268396	0.100569	0.110353	0.21505
	4	0.115971	0.109047	0.0916104	0.062058		6	0.207504	0.146566	0.0733341	0.187267
	4.33333	0.13748	0.109433	0.086428	0.0586046		6.5	0.402235	0.222141	0.0796135	0.247923
	4.66667	0.108136	0.0969079	0.0835333	0.0847536		7	0.549605	0.198095	0.0818561	0.259659
	5	0.10197	0.104293	0.083982	0.0867413		7.5	0.788434	0.209488	0.0652134	0.219108
	5.33333	0.10589	0.170928	0.0934322	0.0847844		8	0.802461	0.226134	0.0650735	0.259432
	5.66667	0.106954	0.190034	0.0905999	0.0794612		8.5	0.756439	0.177741	0.0708769	0.328007
	6	0.105957	0.137018	0.0870139	0.0854424		9	0.636894	0.174438	0.104422	0.488095
	6.33333	0.105503	0.128097	0.10327	0.0957299		9.5	0.646063	0.178414	0.247752	0.472649
	6.66667	0.107847	0.167296	0.0902977	0.104798		10	0.361016	0.149761	0.326641	0.515423
	7	0.108739	0.0788283	0.0845305	0.102337		10.5	0.416743	0.132916	0.2501	0.506822
	7.33333	0.119154	0.0828425	0.089993	0.0970106		11	0.457975	0.13821	0.501795	0.468381
	7.66667	0.108554	0.0888306	0.0897504	0.0968499		11.5	0.0595784	0.130523	0.464164	0.46641
	8	0.116327	0.0847219	0.0958114	0.10108		12	0.0681452	0.138156	0.565529	0.552587
	8.33333	0.10154	0.0912247	0.0972376	0.0846766		12.5	0.0725607	0.114694	0.782391	0.588769
	8.66667	0.104976	0.0815019	0.0918134	0.109166
	9	0.0920676	0.0882885	0.0818727	0.134547
	9.33333	0.113431	0.0856975	0.0872983	0.114367
	9.66667	0.110845	0.0799405	0.0822686	0.172337
	10	0.102898	0.0842283	0.0774031	0.111651
	10.3333	0.105596	0.095325	0.103378	0.120304
	10.6667	0.104139	0.0828152	0.100582	0.0754912
	11	0.113184	0.0877241	0.0729482	0.0729077
	11.3333	0.0940776	0.11029	0.0734203	0.0843537

## Sheet: Figure 4E
Figure 4E plotted: cultivation-based bacterial abundances from dissected larval zebrafish intestines.
hours post-induction:	24			48
aTc:	–	+		–	+
	8650	29500		126500	7100
	10500	2250		62000	28500
	70500	1650		224000	2250
	55500	75000		48500	10400
	45500	2150		117000	15500
	22000	41000		33000	28000
	72000	68000		301000	6250
	5500	2100		21500	10000
	16500	14000		85500	21500
	86000	64000		97500	8050
	69500	6000		85000	50500
	123500	8350		21000	15000
	118500	52500		73500	2600
	74500	60500		17500	59000
	78000	46000		55500	3250
	31000	6400		87500	84500
	100000	18500		16500	32000
	120000	130000			13000
	105000	30000			6450
	52000				26500
	115000
	46000
	77500
	87000
	200000
sample size (n):	25	19		17	20

## Sheet: Figure 5B
Figure 5B plotted: cultivation-based bacterial abundances from dissected larval zebrafish intestines.
Vibrio strain:	DmotGOF			DcheGOF
aTc:	–	+		–	+
	70	52500		14000	430000
	2650	240000		4150	785000
	5300	135000		5250	355000
	5550	230000		7450	490000
	5650	99500		20500	190000
	405	275000		2150	425000
	75	69500		68500	140000
	3350	160000		11000	170000
	15000	355000		20500	480000
	6200	135000		4450	820000
	7750	125000		8500	180000
	17500	180000		5800	480000
	45	140000		3750	260000
	12500	170000		6300	490000
	17000	95500		10500	475000
	3650	250000		3250	135000
	45	350000			395000
	50	210000			720000
	9400				95000
					250000
sample size (n):	19	18		16	20

[truncated: 16 more sheets: Figure 5C, Figure 5E, Figure 6B, Figure 6C, Figure 7B, Figure 7C, Δche time traces, Figure S1B, Figure S1C, Figure S2A, Figure S3E, Figure S3F, Figure S4B, Figure S4C, Figure S4D, Figure S4E]
